# Supplementary material for: Microsecond charge separation upon photoexcitation of gold nanoparticles in imidazolium ionic liquids
Source: Royal Society of Chemistry journal article supplement (doi:10.1039/b814384f), 2008-11-11
Supplement: b814384f.pdf [file b814384f.pdf]

Electronic Supporting Information (ESI)

**Microsecond Charge Separation upon Photoexcitation of gold nanoparticles in Imidazolium Ionic Liquids**

Carmela Aprile,<sup>a</sup> María Ángeles Herranz,<sup>b</sup> Esther Carbonell,<sup>a</sup> Hermenegildo Garcia,<sup>a,\*</sup> and Nazario Martín<sup>b,\*</sup>

<sup>a</sup> Instituto de Tecnología Química CSIC-UPV and Departamento de Química, Universidad Politécnica de Valencia, Av. de los Naranjos s/n, 46022 Valencia, Spain. Fax: (+34) 96-387-7349; E-mail: [hgarcia@qim.upv.es](mailto:hgarcia@qim.upv.es)

<sup>b</sup> Departamento de Química Orgánica I, Facultad de Química, Universidad Complutense de Madrid, E-28040, Madrid, Spain. Fax: (+34) 91-394-4103; E-mail: [nazmar@quim.ucm.es](mailto:nazmar@quim.ucm.es)

**Figure S1.** Statistical analysis of colloidal gold particle size distribution.

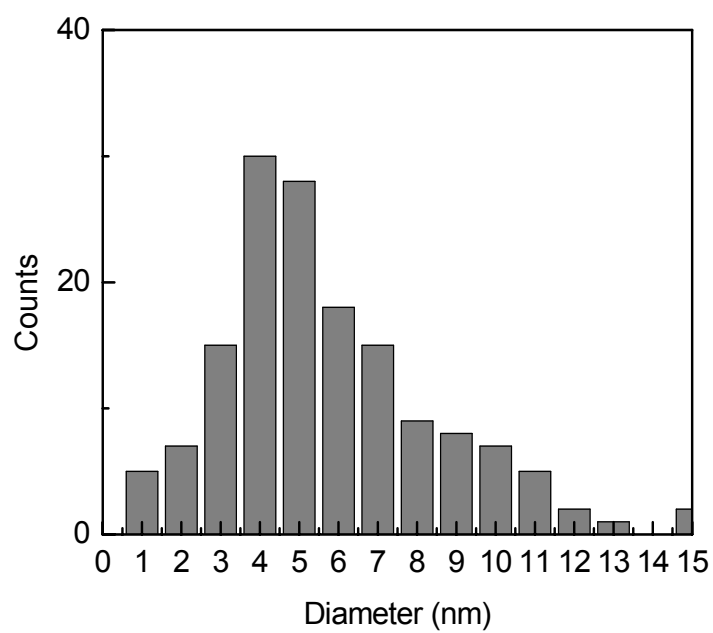

**Figure S2.** Transient spectrum of npAuC<sub>12</sub> in bmimPF<sub>6</sub> after excitation at 355 nm.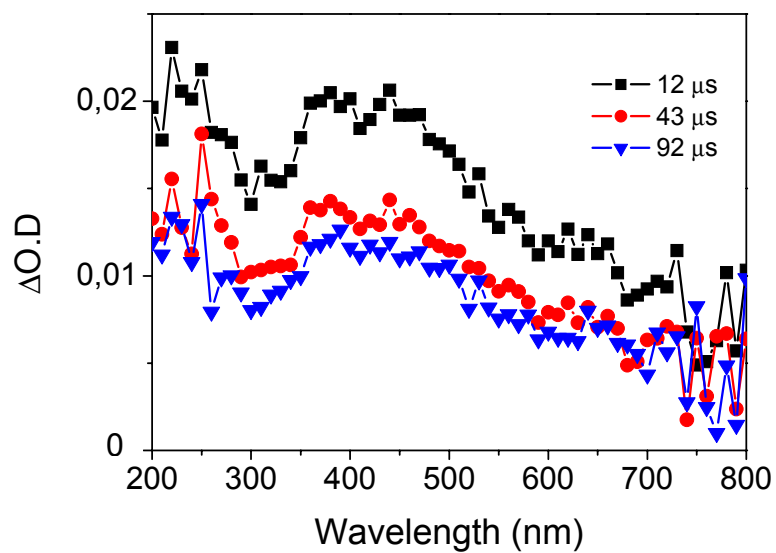

Normalized decays of the signal monitored at 420 (■), 510 (●), 580 (▲) and 620 (▼) nm of npAuC<sub>12</sub> in bmimPF<sub>6</sub>

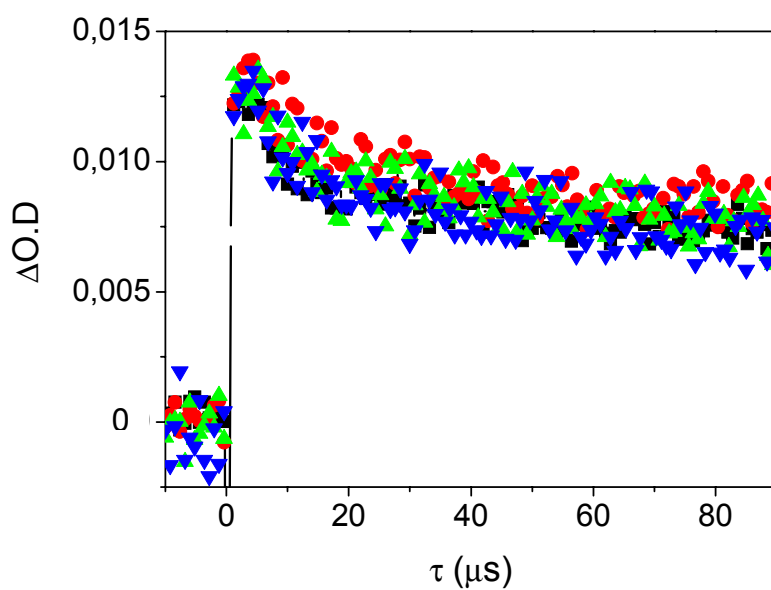

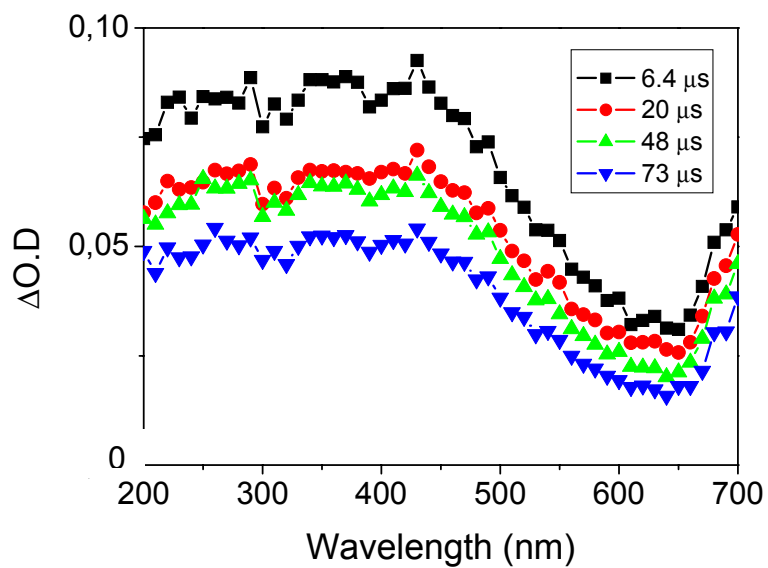

**Figure S3.** Transient spectrum of npAuC<sub>18</sub> in bmimPF<sub>6</sub> after excitation at 355 nm.

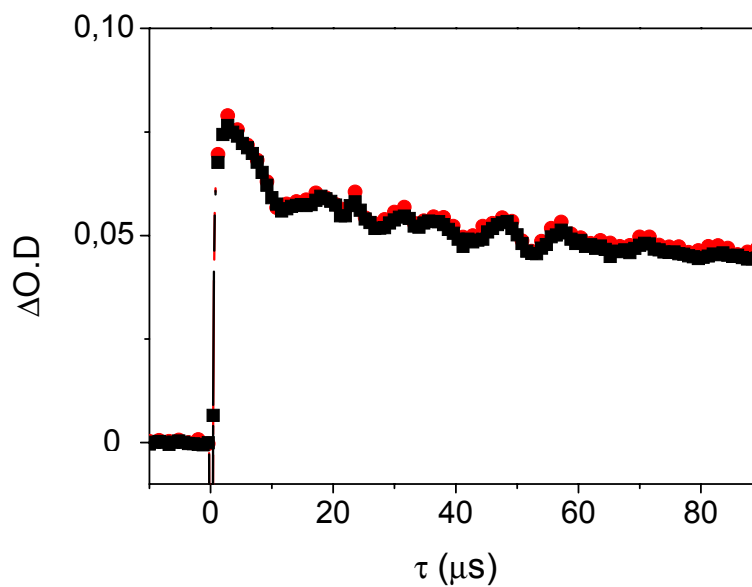

**Figure S4.** Normalized decays of the signal monitored at 375 (■) and 470 (●) nm in

N<sub>2</sub>-purged bmimPF<sub>6</sub> solutions of npAuC<sub>18</sub>.
